# Supplementary material for: Effect of Storage Time on the Physical, Chemical, and Rheological Properties of Blueberry Jam: Experimental Measurements and Artificial Neural Network Simulation
Source: MDPI journal article supplement (doi:10.3390/foods12152853), 2023-07-27
Supplement: s1 [file s1]

## Supplementary Materials

*Article*

# Effect of Storage Time on the Physical, Chemical, and Rheological Properties of Blueberry Jam: Experimental Measurements and Artificial Neural Network Simulation

Daniela Helena Pelegrine Guimarães <sup>1</sup>, Ana Lúcia Gabas Ferreira <sup>2,\*</sup> and Pedro Felipe Arce<sup>1</sup>

<sup>1</sup> Department of Chemical Engineering, Engineering School of Lorena, University of São Paulo, Lorena 12602-810, SP, Brazil; dhguima@usp.br (D.H.P.G.); parce@usp.br (P.F.A.)

<sup>2</sup> Department of Basic and Environmental Sciences, Engineering School of Lorena, University of São Paulo, Lorena 12602-810, SP, Brazil

\* Correspondence: gabas@usp.br

**Table S1.** Means and standard deviations of the results of the physicochemical analyses of the blueberry jams of the Climax and Powder Blue varieties during the storage period.

|    | Storage (Days) | pH                        | Acidity (%)               | Anthocyanin (mg/100 g)    | Reducing Sugar (%)        | Water Activity            | Soluble Solids (°Brix)      |
|----|----------------|---------------------------|---------------------------|---------------------------|---------------------------|---------------------------|-----------------------------|
| FA | 0              | 3.23 ± 0.057 <sup>a</sup> | 0.57 ± 0.067 <sup>a</sup> | 29.57 ± 5.08 <sup>a</sup> | 50.49 ± 1.75 <sup>a</sup> | 0.75 ± 0.01 <sup>a</sup>  | 48.7 ± 0.001 <sup>a</sup>   |
|    | 30 days        | 3.32 ± 0.046 <sup>a</sup> | 0.56 ± 0.029 <sup>a</sup> | 31.85 ± 4.63 <sup>a</sup> | 52.77 ± 1.25 <sup>a</sup> | 0.75 ± 0.11 <sup>a</sup>  | 48.0 ± 0.001 <sup>a</sup>   |
|    | 90 days        | 3.23 ± 0.056 <sup>a</sup> | 0.57 ± 0.067 <sup>a</sup> | 29.57 ± 1.80 <sup>a</sup> | 54.96 ± 3.95 <sup>a</sup> | 0.75 ± 0.06 <sup>a</sup>  | 52.3 ± 0.002 <sup>b</sup>   |
|    | 120 days       | 3.26 ± 0.015 <sup>a</sup> | 0.60 ± 0.028 <sup>a</sup> | 28.19 ± 3.78 <sup>a</sup> | 47.60 ± 1.39 <sup>a</sup> | 0.82 ± 0.01 <sup>a</sup>  | 53.5 ± 0.002 <sup>b</sup>   |
|    | MSD            |                           |                           |                           |                           |                           | 3.32                        |
| FB | 0              | 3.52 ± 0.040 <sup>a</sup> | 0.42 ± 0.016 <sup>a</sup> | 54.95 ± 4.05 <sup>a</sup> | 32.87 ± 0.72 <sup>a</sup> | 0.928 ± 0.01 <sup>a</sup> | 35.1 ± 0.001 <sup>a</sup>   |
|    | 30 days        | 3.97 ± 0.030 <sup>a</sup> | 0.34 ± 0.064 <sup>a</sup> | 46.97 ± 3.09 <sup>b</sup> | 35.89 ± 0.18 <sup>a</sup> | 0.836 ± 0.02 <sup>a</sup> | 35.0 ± 0.001 <sup>a</sup>   |
|    | 90 days        | 3.52 ± 0.040 <sup>a</sup> | 0.42 ± 0.016 <sup>a</sup> | 42.92 ± 1.51 <sup>b</sup> | 34.80 ± 5.33 <sup>a</sup> | 0.928 ± 0.01 <sup>a</sup> | 35.1 ± 0.003 <sup>a</sup>   |
|    | 120 days       | 3.63 ± 0.041 <sup>a</sup> | 0.36 ± 0.077 <sup>a</sup> | 39.41 ± 1.57 <sup>b</sup> | 34.39 ± 1.86 <sup>a</sup> | 0.907 ± 0.02 <sup>a</sup> | 34.8 ± 0.001 <sup>a</sup>   |
|    | MSD            |                           |                           | 7.25                      |                           |                           |                             |
| FC | 0              | 3.23 ± 0.012 <sup>a</sup> | 0.69 ± 0.088 <sup>a</sup> | 39.96 ± 2.5 <sup>a</sup>  | 63.58 ± 2.47 <sup>a</sup> | 0.719 ± 0.01 <sup>a</sup> | 53.3 ± 0.001 <sup>a</sup>   |
|    | 30 days        | 3.28 ± 0.068 <sup>a</sup> | 0.69 ± 0.006 <sup>a</sup> | 33.67 ± 3.30 <sup>b</sup> | 62.75 ± 1.49 <sup>a</sup> | 0.748 ± 0.04 <sup>a</sup> | 50.3 ± 0.002 <sup>b</sup>   |
|    | 90 days        | 3.23 ± 0.012 <sup>a</sup> | 0.69 ± 0.009 <sup>a</sup> | 28.65 ± 3.2 <sup>c</sup>  | 60.77 ± 5.71 <sup>a</sup> | 0.788 ± 0.05 <sup>b</sup> | 54.3 ± 0.002 <sup>ca</sup>  |
|    | 120 days       | 3.28 ± 0.014 <sup>a</sup> | 0.71 ± 0.021 <sup>a</sup> | 22.05 ± 4.50 <sup>d</sup> | 52.09 ± 1.78 <sup>b</sup> | 0.783 ± 0.01 <sup>b</sup> | 52.6 ± 0.001 <sup>cba</sup> |
|    | MSD            |                           |                           | 4.92                      | 7.64                      | 0.04                      | 2.95                        |
| FD | 0              | 3.28 ± 0.019 <sup>a</sup> | 0.44 ± 0.024 <sup>a</sup> | 74.05 ± 5.19 <sup>a</sup> | 28.86 ± 1.48 <sup>a</sup> | 0.893 ± 0.03 <sup>a</sup> | 40.6 ± 0.001 <sup>a</sup>   |
|    | 30 days        | 3.57 ± 0.012 <sup>a</sup> | 0.43 ± 0.024 <sup>a</sup> | 63.92 ± 5.73 <sup>b</sup> | 32.97 ± 0.85 <sup>a</sup> | 0.913 ± 0.01 <sup>a</sup> | 40.3 ± 0.001 <sup>a</sup>   |
|    | 90 days        | 3.47 ± 0.055 <sup>a</sup> | 0.44 ± 0.024 <sup>a</sup> | 54.97 ± 5.60 <sup>b</sup> | 35.65 ± 2.19 <sup>a</sup> | 0.893 ± 0.03 <sup>a</sup> | 41.3 ± 0.002 <sup>a</sup>   |
|    | 120 days       | 3.49 ± 0.032 <sup>a</sup> | 0.38 ± 0.008 <sup>a</sup> | 40.86 ± 2.99 <sup>c</sup> | 32.01 ± 1.49 <sup>a</sup> | 0.911 ± 0.00 <sup>a</sup> | 41.1 ± 0.001 <sup>a</sup>   |
|    | MSD            |                           |                           | 9.18                      |                           |                           |                             |

Note: the same letter in the same column means that there is no difference between the samples at the 5% significance level. Source: Authors. MSD: minimal significant difference. Means of the three repetitions of the physicochemical analyses ± standard deviations. Means with the same letter in the same column for the same jam do not differ significantly from each other ( $\alpha = 5\%$ ). FA: conventional jam prepared with Powder Blue fruit and synthetic ATM pectin. FB: light jelly prepared with fruit of the Powder Blue variety and pectin BTM+ gummies. FC: conventional jelly prepared with Climax fruit and pectin extracted from passion fruit peel. FD: light jelly prepared with fruit from the Climax variety and pectin BTM+ gummies.

**Table S2.** Texture analysis results of Climax and Powder blue blueberry jellies.

| Property                 | Storage<br>(Days) | FA                        | FB                        | FC                        | FD                           |
|--------------------------|-------------------|---------------------------|---------------------------|---------------------------|------------------------------|
| Hard-<br>ness<br>(N)     | 0                 | 11.06 ± 1.13 <sup>a</sup> | 6.24 ± 0.48 <sup>a</sup>  | 6.99 ± 0.05 <sup>a</sup>  | 5.92 ± 0.38 <sup>a</sup> (N) |
|                          | 30                | 11.58 ± 1.34 <sup>a</sup> | 5.88 ± 0.212 <sup>a</sup> | 7.00 ± 0.06 <sup>a</sup>  | 5.90 ± 0.12 <sup>a</sup> (N) |
|                          | 90                | 9.36 ± 0.50 <sup>b</sup>  | 4.37 ± 0.25 <sup>b</sup>  | 7.06 ± 0.04 <sup>a</sup>  | 4.83 ± 0.56 <sup>b</sup> (N) |
|                          | 120               | 8.09 ± 0.62 <sup>b</sup>  | 4.51 ± 0.33 <sup>b</sup>  | 6.89 ± 0.07 <sup>a</sup>  | 4.86 ± 0.35 <sup>b</sup> (N) |
| MSD                      |                   | 2.19                      | 0.77                      |                           | 0.84                         |
| Adhesiv<br>eness<br>(mJ) | 0                 | 84.54 ± 2.85 <sup>a</sup> | 69.75 ± 3.52 <sup>a</sup> | 38.74 ± 3.00 <sup>a</sup> | 37.83 ± 2.58 <sup>a</sup>    |
|                          | 30                | 73.04 ± 3.78 <sup>b</sup> | 59.96 ± 3.73 <sup>b</sup> | 24.51 ± 3.26 <sup>b</sup> | 22.91 ± 2.17 <sup>b</sup>    |
|                          | 90                | 28.14 ± 4.88 <sup>c</sup> | 42.32 ± 2.68 <sup>c</sup> | 20.56 ± 1.99 <sup>b</sup> | 25.61 ± 2.08 <sup>b</sup>    |
|                          | 120               | 19.6 ± 2.15 <sup>d</sup>  | 39.54 ± 2.54 <sup>c</sup> | 18.77 ± 1.78 <sup>b</sup> | 20.86 ± 2.19 <sup>b</sup>    |
| MSD                      |                   | 8.32                      | 8.28                      | 6.58                      | 5.58                         |

Note: the same letter in the same column means that there is no difference between the samples at the 5% significance level.

**Table S3.** Weights and bias of the optimized ANN architecture for the Input—First Hidden layer connections.

| j  | Weights    |            |            |            |            |            |            |            |            |             | Bias       |
|----|------------|------------|------------|------------|------------|------------|------------|------------|------------|-------------|------------|
|    | $w_{j1}^I$ | $w_{j2}^I$ | $w_{j3}^I$ | $w_{j4}^I$ | $w_{j5}^I$ | $w_{j6}^I$ | $w_{j7}^I$ | $w_{j8}^I$ | $w_{j9}^I$ | $w_{j10}^I$ | $b_j^{H1}$ |
| 1  | -0.6357    | -0.5108    | -0.1786    | 0.5038     | -0.3848    | -1.0681    | 0.4206     | -0.7459    | 2.0406     | -0.3282     | -0.5309    |
| 2  | -1.0896    | 0.3475     | 0.6895     | 0.3261     | -0.4256    | 0.5366     | 0.2124     | 0.4905     | -0.6655    | 0.2671      | -0.9347    |
| 3  | -0.7812    | 0.6989     | 0.2713     | -0.4453    | -0.2633    | -0.4535    | 0.7429     | 0.6091     | -0.3293    | 0.2657      | -0.7290    |
| 4  | 0.7032     | -0.6687    | 0.3930     | 0.0865     | 0.5853     | -0.3894    | -0.3574    | -0.6595    | -0.7117    | 2.0604      | 0.3068     |
| 5  | 0.4649     | -0.6013    | -0.1172    | 0.1648     | 0.5654     | 0.0815     | 0.7869     | 0.0528     | 0.5512     | -0.7455     | 0.6457     |
| 6  | -0.5261    | 0.2816     | -0.6346    | 0.1892     | -0.4504    | 3.0662     | 0.7709     | 0.2412     | 0.5332     | -0.7967     | -1.1694    |
| 7  | -0.3938    | -3.0081    | 0.3432     | 0.3051     | 0.5848     | 0.4533     | -0.1817    | 0.3976     | -0.4579    | 1.0286      | 0.7389     |
| 8  | 0.2551     | -0.1464    | -0.5807    | 0.3040     | 0.6392     | 0.4095     | 0.1962     | -0.3702    | 0.4444     | -0.0924     | -0.8233    |
| 9  | -0.3732    | 0.7073     | 0.5536     | 0.3318     | -0.6542    | 0.7022     | 0.7249     | -0.4923    | -0.2418    | -0.4644     | -0.1817    |
| 10 | -0.1013    | 0.7471     | 1.0960     | 0.1323     | 0.3160     | 0.0486     | 0.3314     | -0.0697    | 0.1553     | 0.3933      | 0.0036     |
| 11 | -0.4934    | -0.7023    | -0.0342    | 0.6094     | 0.0614     | 2.3166     | 0.0935     | 0.6375     | -0.5524    | 0.2920      | 0.9965     |
| 12 | -0.1436    | -0.6840    | -0.4256    | -0.3347    | 0.1771     | 0.7670     | 0.5477     | -0.0755    | -0.3801    | -0.7056     | -0.6661    |
| 13 | 0.1976     | 0.0851     | -0.5886    | -0.5298    | 0.1291     | -0.1918    | -0.3245    | 0.2479     | -0.4210    | -2.1438     | -1.1635    |
| 14 | -0.3553    | -0.6451    | 0.4384     | -0.4536    | 0.3032     | 0.0459     | 0.4028     | -0.6441    | 0.7233     | -0.1907     | 0.4716     |
| 15 | -0.3040    | 0.1492     | 0.2667     | 0.4454     | -0.4185    | 0.3459     | -0.4031    | -0.1360    | -0.1285    | -0.6705     | 0.5405     |
| 16 | -0.1416    | -0.0720    | 0.2452     | 0.5479     | -0.5831    | 0.0629     | 0.4834     | 0.5011     | 0.6442     | -0.4323     | -0.0211    |
| 17 | -0.7250    | 0.7296     | -0.1576    | 0.5177     | 1.0493     | -0.7753    | -0.3572    | -0.4582    | 0.2340     | 1.5165      | 0.3665     |
| 18 | -0.3520    | -1.2704    | -0.7613    | -0.1229    | 0.6842     | -0.1499    | 0.1523     | -2.0210    | -0.7409    | -0.3255     | 0.3658     |
| 19 | 0.5149     | -0.3997    | 0.6444     | 0.1653     | -0.0250    | -0.1741    | 0.1626     | -0.3129    | -0.4441    | 0.3424      | 0.8492     |
| 20 | -0.2814    | -0.2751    | 0.1773     | -0.5971    | -0.1645    | 0.3689     | 0.1572     | -0.6257    | -0.1560    | -0.3506     | 0.8369     |
| 21 | -0.3793    | 0.3922     | -0.1040    | -0.0682    | -0.3888    | -0.4364    | 0.4193     | -0.4344    | -0.0210    | -0.7604     | -0.8171    |
| 22 | -0.3954    | 0.2263     | -0.4532    | -0.2175    | 0.5788     | 0.3323     | -0.5057    | -0.7909    | -0.1237    | -0.5986     | -1.1115    |
| 23 | -0.7860    | -0.2951    | -0.4913    | 2.1674     | 0.3150     | 0.2264     | -1.7108    | -0.2315    | -0.0076    | -0.0204     | 0.2746     |
| 24 | 0.3712     | -0.7540    | -1.0952    | -0.3667    | -0.6334    | -0.6670    | 0.1721     | -0.0207    | 0.7810     | 0.0025      | -0.5019    |
| 25 | 0.6271     | -0.7043    | -0.0533    | 0.7517     | 0.6452     | 1.0558     | 0.7987     | -0.6721    | -0.3424    | -0.4126     | -0.2957    |
| 26 | -0.1059    | -0.4427    | 2.0445     | 0.9746     | 0.6998     | 0.3581     | 0.5040     | 0.4151     | -0.1502    | 3.0078      | 0.6785     |
| 27 | -0.0913    | -1.6201    | 0.3687     | -0.4960    | -0.0222    | -0.7863    | 0.0864     | -0.3973    | -0.0912    | -0.1354     | -1.1403    |
| 28 | 0.4337     | -0.7782    | -0.0126    | -1.0290    | 0.3726     | 0.3009     | -2.0360    | 0.4266     | -0.3380    | -0.6366     | -0.8983    |
| 29 | -0.2684    | 0.7392     | -0.4331    | -0.7450    | 0.6544     | -0.6694    | 0.4604     | 0.6413     | -0.7054    | 0.4592      | 0.3591     |
| 30 | 0.5916     | 1.6489     | 0.3135     | 0.6132     | 0.6492     | -0.1005    | 1.5804     | 0.7683     | -0.3985    | 0.2320      | -1.1271    |

**Table S4.** Weights and bias of the optimized ANN architecture for the First Hidden layer—Second Hidden layer connections.

| j  | Weights          |                  |                  |                  |                  |                  |                  |                  |                  |                   | Bias          |
|----|------------------|------------------|------------------|------------------|------------------|------------------|------------------|------------------|------------------|-------------------|---------------|
|    | $w^{H1-H2}_{j1}$ | $w^{H1-H2}_{j2}$ | $w^{H1-H2}_{j3}$ | $w^{H1-H2}_{j4}$ | $w^{H1-H2}_{j5}$ | $w^{H1-H2}_{j6}$ | $w^{H1-H2}_{j7}$ | $w^{H1-H2}_{j8}$ | $w^{H1-H2}_{j9}$ | $w^{H1-H2}_{j10}$ | $b^{H1-H2}_j$ |
| 1  | -2.6449          | 1.3735           | -0.9075          | 4.1159           | 2.9453           | 4.8557           | -4.8126          | -1.6643          | 4.3173           | -5.8680           | 2.5017        |
| 2  | -4.8824          | 1.6616           | 5.7123           | 3.0834           | -5.4991          | -2.1752          | 4.3592           | -5.6295          | -2.8701          | -1.3992           | 2.7613        |
| 3  | -1.9045          | 2.9827           | -2.1777          | -3.0621          | -5.1626          | 4.2623           | -3.6795          | -3.6362          | 3.5036           | 3.8335            | -2.1512       |
| 4  | 4.8963           | 1.5703           | 1.9533           | 0.0096           | 4.0637           | 0.0364           | 4.8571           | 1.8921           | 5.7883           | -5.8431           | 1.7418        |
| 5  | -0.9085          | 5.2861           | -4.3578          | -0.6933          | -3.7329          | 1.4681           | 5.9214           | 4.3376           | 1.5197           | -1.2636           | 1.9046        |
| 6  | 3.6961           | 3.0207           | -5.0122          | 4.0037           | -4.3503          | 2.5647           | -3.4917          | -3.2834          | -1.5362          | -3.2114           | -1.9628       |
| 7  | 3.9373           | -3.4505          | -2.1303          | 3.8368           | -0.0744          | 0.9233           | -3.6643          | 1.0608           | -3.2109          | 3.8113            | 0.8077        |
| 8  | 2.3162           | -3.2266          | 4.5751           | -1.9204          | 1.2481           | 1.3031           | -1.9635          | -0.2163          | 5.0436           | -5.9167           | 0.8956        |
| 9  | -3.8509          | 2.9992           | 1.3154           | -3.7692          | 0.5952           | -0.9935          | -2.0661          | -5.9197          | -2.6953          | 2.4069            | 1.7416        |
| 10 | -3.4843          | 3.0664           | 0.8155           | 3.3501           | 5.6696           | 4.3377           | -5.6117          | -5.6110          | -2.2471          | 2.8333            | -1.6305       |

**Table S4.** (continuation).

| J  | Weights           |                   |                   |                   |                   |                   |                   |                   |                   |                   | Bias          |
|----|-------------------|-------------------|-------------------|-------------------|-------------------|-------------------|-------------------|-------------------|-------------------|-------------------|---------------|
|    | $w^{H1-H2}_{j11}$ | $w^{H1-H2}_{j12}$ | $w^{H1-H2}_{j13}$ | $w^{H1-H2}_{j14}$ | $w^{H1-H2}_{j15}$ | $w^{H1-H2}_{j16}$ | $w^{H1-H2}_{j17}$ | $w^{H1-H2}_{j18}$ | $w^{H1-H2}_{j19}$ | $w^{H1-H2}_{j20}$ | $b^{H1-H2}_j$ |
| 1  | 4.2187            | -3.9299           | -5.5090           | 5.1692            | -0.8806           | -4.5731           | 2.0447            | 1.8047            | 2.3807            | 4.6724            | 2.1841        |
| 2  | 3.6943            | -3.7065           | 4.7034            | 0.9581            | -5.7107           | 2.0814            | 2.2893            | -0.0373           | -3.7324           | 0.6655            | 3.1063        |
| 3  | 4.8175            | 1.6356            | 1.2392            | -5.4923           | -1.8963           | -0.6420           | -5.9814           | 5.4615            | 1.6483            | -0.4983           | -3.3512       |
| 4  | 4.4362            | -2.8753           | -0.8116           | -2.2844           | -5.9524           | 1.0622            | 2.1006            | 1.0702            | 4.8241            | 2.3121            | 2.7151        |
| 5  | -2.2705           | 5.4765            | 2.5333            | 0.5222            | 2.3211            | 1.5264            | 5.9252            | -1.3352           | -2.3025           | -1.7018           | -1.6329       |
| 6  | -5.0202           | 5.95107           | 2.5484            | 1.8481            | 0.9783            | 3.5185            | -1.7921           | -2.5298           | -2.4702           | 0.8699            | 1.0849        |
| 7  | -1.4195           | -5.0702           | -0.9431           | 0.1597            | 0.2646            | -5.3451           | 2.1795            | 1.7123            | -0.0853           | 0.4415            | 0.8163        |
| 8  | 5.1287            | -3.2313           | -1.9736           | -3.5944           | -4.9863           | -0.7293           | -3.9198           | -4.0792           | 0.8218            | 0.9197            | 1.8417        |
| 9  | 2.1621            | 2.6651            | 3.4643            | 0.1847            | -1.2464           | -4.5309           | -3.1384           | -0.4014           | 4.7614            | -3.1643           | -0.7457       |
| 10 | -0.7538           | -1.7775           | 3.2508            | 1.4081            | 3.4759            | -1.3006           | -5.5583           | -0.1982           | -0.4537           | 4.8526            | 0.6978        |

**Table S4.** (continuation).

| j  | Weights           |                   |                   |                   |                   |                   |                   |                   |                   |                   | Bias          |
|----|-------------------|-------------------|-------------------|-------------------|-------------------|-------------------|-------------------|-------------------|-------------------|-------------------|---------------|
|    | $w^{H1-H2}_{j21}$ | $w^{H1-H2}_{j22}$ | $w^{H1-H2}_{j23}$ | $w^{H1-H2}_{j24}$ | $w^{H1-H2}_{j25}$ | $w^{H1-H2}_{j26}$ | $w^{H1-H2}_{j27}$ | $w^{H1-H2}_{j28}$ | $w^{H1-H2}_{j29}$ | $w^{H1-H2}_{j30}$ | $b^{H1-H2}_j$ |
| 1  | -1.2324           | 0.7433            | -0.8924           | -2.5185           | -0.2917           | 3.9491            | -2.0469           | -1.5108           | -3.5564           | -5.4118           | 2.8581        |
| 2  | 2.7317            | 2.8182            | 4.8312            | -5.3062           | 2.7193            | -3.8453           | -5.4573           | -0.8083           | 0.3001            | 1.7973            | 3.6352        |
| 3  | -0.8791           | -4.8031           | -3.8428           | 5.9568            | -1.3651           | -4.2402           | 4.6511            | 1.8695            | 0.0503            | 2.5621            | -3.9145       |
| 4  | 4.2782            | -5.2326           | -3.8824           | 2.5483            | -0.1343           | -3.9847           | 0.4746            | 3.2442            | 0.9205            | 0.1083            | 1.7419        |
| 5  | -5.5093           | -5.9564           | 2.6671            | -0.9651           | 5.9928            | 5.1745            | 1.5572            | -2.4114           | -1.0794           | 4.8402            | -2.6235       |
| 6  | 0.2847            | 1.0872            | -4.8034           | -1.4655           | 0.3944            | -2.1708           | -4.0131           | -3.6701           | 4.7491            | 4.7127            | 1.6081        |
| 7  | 4.6031            | 3.1148            | 0.3933            | 2.5438            | 5.3172            | -1.0404           | -2.4028           | 0.4847            | -5.7228           | 5.8456            | -1.4051       |
| 8  | -1.7988           | 3.3715            | -2.7318           | -0.7723           | 0.6027            | 2.4671            | -1.2503           | -0.0233           | -3.1493           | 2.0214            | 1.3665        |
| 9  | -3.8274           | -1.4439           | 2.7892            | 3.6589            | -0.5113           | -1.4414           | 4.9486            | -3.0428           | -4.4251           | 0.3976            | 0.8048        |
| 10 | -4.1866           | 2.9951            | 0.1116            | -1.1921           | -5.0384           | 0.9771            | -4.2623           | -0.0769           | -4.6909           | -0.2625           | 0.6307        |

**Table S5.** Weights and bias of the optimized ANN architecture for the Second Hidden layer—Output connections.

| j | Weights       |               |               |               |               |               |               |               |               |                | Bias    |
|---|---------------|---------------|---------------|---------------|---------------|---------------|---------------|---------------|---------------|----------------|---------|
|   | $w^{H2}_{j1}$ | $w^{H2}_{j2}$ | $w^{H2}_{j3}$ | $w^{H2}_{j4}$ | $w^{H2}_{j5}$ | $w^{H2}_{j6}$ | $w^{H2}_{j7}$ | $w^{H2}_{j8}$ | $w^{H2}_{j9}$ | $w^{H2}_{j10}$ | $b^0_k$ |
| 1 | −0.2641       | 0.5178        | 0.1109        | −0.8409       | 0.8597        | −0.7761       | −0.9684       | −0.3583       | −0.7109       | 0.3125         | −0.8085 |
| 2 | −0.6923       | −0.9211       | 0.0572        | 0.4562        | −0.1613       | −0.0598       | −0.7016       | −0.0947       | 0.9221        | 0.2533         | −0.7813 |
| 3 | 0.7614        | −0.5830       | 0.4823        | −0.5695       | −0.1327       | 0.9143        | 0.5075        | 0.3591        | −0.4193       | −0.5674        | −1.0418 |

**Table S6.** Results obtained for the three dependent variables for the prediction step for architectures X-X-3.

| Architecture | Run | % Hardness | % Water Activity | % Adhesiveness | % Average |
|--------------|-----|------------|------------------|----------------|-----------|
| 2-3-3        | 26  | 0.55       | 0.90             | 0.68           | 0.71      |
| 2-5-3        | 29  | 1.14       | 0.89             | 0.73           | 0.92      |
| 2-10-3       | 9   | 0.94       | 0.60             | 0.90           | 0.81      |
| 2-15-3       | 50  | 0.54       | 0.88             | 0.58           | 0.67      |
| 2-20-3       | 16  | 1.07       | 0.51             | 1.09           | 0.89      |
| 2-25-3       | 43  | 0.87       | 1.00             | 0.93           | 0.93      |
| 2-30-3       | 13  | 1.17       | 1.17             | 1.09           | 1.14      |
| 3-3-3        | 11  | 1.20       | 1.10             | 0.87           | 1.06      |
| 3-5-3        | 25  | 0.50       | 1.01             | 1.20           | 0.90      |
| 3-10-3       | 40  | 0.92       | 1.10             | 0.56           | 0.86      |
| 3-15-3       | 44  | 0.89       | 1.19             | 0.55           | 0.88      |
| 3-20-3       | 23  | 0.78       | 0.61             | 0.97           | 0.79      |
| 3-25-3       | 15  | 1.14       | 1.10             | 1.16           | 1.13      |
| 3-30-3       | 22  | 0.91       | 0.72             | 0.87           | 0.83      |
| 5-3-3        | 24  | 0.64       | 0.87             | 1.06           | 0.86      |
| 5-5-3        | 7   | 1.00       | 0.60             | 1.06           | 0.89      |
| 5-10-3       | 29  | 1.14       | 0.87             | 0.86           | 0.96      |
| 5-15-3       | 2   | 0.97       | 0.81             | 0.55           | 0.78      |
| 5-20-3       | 25  | 1.12       | 0.95             | 0.62           | 0.90      |
| 5-25-3       | 9   | 0.74       | 0.87             | 0.73           | 0.78      |
| 5-30-3       | 17  | 0.71       | 0.94             | 1.08           | 0.91      |
| 10-3-3       | 12  | 1.10       | 0.86             | 1.02           | 0.99      |
| 10-5-3       | 37  | 1.19       | 0.60             | 0.97           | 0.92      |
| 10-10-3      | 15  | 0.69       | 0.70             | 0.55           | 0.65      |
| 10-15-3      | 2   | 0.98       | 1.06             | 0.73           | 0.92      |
| 10-20-3      | 46  | 0.58       | 1.19             | 1.10           | 0.96      |
| 10-25-3      | 9   | 0.64       | 0.51             | 1.09           | 0.75      |
| 10-30-3      | 40  | 1.12       | 1.17             | 0.63           | 0.97      |
| 15-3-3       | 28  | 0.67       | 1.14             | 0.71           | 0.84      |
| 15-5-3       | 12  | 1.05       | 0.98             | 0.99           | 1.01      |
| 15-10-3      | 42  | 1.18       | 1.19             | 0.53           | 0.97      |
| 15-15-3      | 18  | 1.10       | 0.75             | 0.81           | 0.89      |
| 15-20-3      | 20  | 0.57       | 0.73             | 1.10           | 0.80      |
| 15-25-3      | 2   | 1.04       | 0.70             | 0.92           | 0.89      |
| 15-30-3      | 20  | 0.75       | 0.56             | 0.74           | 0.68      |
| 20-3-3       | 22  | 0.89       | 0.55             | 1.19           | 0.88      |
| 20-5-3       | 24  | 1.20       | 0.93             | 0.66           | 0.93      |
| 20-10-3      | 14  | 0.82       | 0.75             | 0.76           | 0.78      |
| 20-15-3      | 35  | 0.99       | 0.80             | 0.87           | 0.89      |
| 20-20-3      | 4   | 0.57       | 0.87             | 1.03           | 0.82      |
| 20-25-3      | 26  | 0.79       | 0.61             | 0.66           | 0.69      |
| 20-30-3      | 10  | 0.59       | 0.58             | 1.19           | 0.79      |
| 25-3-3       | 25  | 1.04       | 1.04             | 0.68           | 0.92      |
| 25-5-3       | 41  | 1.07       | 0.83             | 1.09           | 1.00      |
| 25-10-3      | 15  | 0.93       | 0.80             | 0.50           | 0.74      |
| 25-15-3      | 16  | 0.54       | 0.88             | 1.20           | 0.87      |
| 25-20-3      | 28  | 0.67       | 0.88             | 0.58           | 0.71      |
| 25-25-3      | 18  | 0.94       | 0.78             | 1.07           | 0.93      |
| 25-30-3      | 35  | 1.20       | 1.11             | 0.57           | 0.96      |

**Table S7.** Results obtained for the three dependent variables for the prediction step for architectures 3-X-X-3.

| Architecture | Run | % Hardness | % Water Activity | % Adhesiveness | % Average |
|--------------|-----|------------|------------------|----------------|-----------|
| 3-2-3-3      | 24  | 0.81       | 0.78             | 0.80           | 0.80      |
| 3-2-5-3      | 43  | 0.45       | 0.46             | 0.75           | 0.55      |
| 3-2-10-3     | 12  | 0.87       | 0.41             | 0.27           | 0.52      |
| 3-2-15-3     | 34  | 0.39       | 0.95             | 0.49           | 0.61      |
| 3-2-20-3     | 12  | 0.44       | 0.81             | 0.69           | 0.65      |
| 3-2-25-3     | 4   | 1.00       | 0.33             | 0.84           | 0.72      |
| 3-2-30-3     | 27  | 0.44       | 0.32             | 0.56           | 0.44      |
| 3-3-3-3      | 15  | 0.53       | 0.66             | 0.43           | 0.54      |
| 3-3-5-3      | 2   | 0.31       | 0.81             | 0.87           | 0.66      |
| 3-3-10-3     | 18  | 0.93       | 0.40             | 0.28           | 0.54      |
| 3-3-15-3     | 45  | 0.74       | 0.93             | 0.25           | 0.64      |
| 3-3-20-3     | 20  | 0.72       | 0.87             | 0.44           | 0.68      |
| 3-3-25-3     | 6   | 0.91       | 0.34             | 0.53           | 0.59      |
| 3-3-30-3     | 43  | 0.46       | 0.86             | 0.55           | 0.62      |
| 3-5-3-3      | 15  | 0.73       | 0.27             | 0.74           | 0.58      |
| 3-5-5-3      | 35  | 0.43       | 0.42             | 0.91           | 0.59      |
| 3-5-10-3     | 39  | 0.64       | 0.54             | 0.84           | 0.67      |
| 3-5-15-3     | 3   | 0.34       | 0.72             | 0.97           | 0.68      |
| 3-5-20-3     | 16  | 0.85       | 0.79             | 0.43           | 0.69      |
| 3-5-25-3     | 32  | 0.34       | 0.77             | 0.51           | 0.54      |
| 3-5-30-3     | 36  | 0.88       | 0.46             | 0.67           | 0.67      |
| 3-10-3-3     | 10  | 0.87       | 0.30             | 0.76           | 0.64      |
| 3-10-5-3     | 13  | 0.36       | 0.68             | 0.65           | 0.56      |
| 3-10-10-3    | 40  | 0.81       | 0.44             | 0.93           | 0.73      |
| 3-10-15-3    | 34  | 0.87       | 0.35             | 0.83           | 0.68      |
| 3-10-20-3    | 15  | 0.32       | 0.74             | 0.28           | 0.45      |
| 3-10-25-3    | 33  | 0.70       | 1.00             | 0.38           | 0.69      |
| 3-10-30-3    | 32  | 0.84       | 0.78             | 0.34           | 0.65      |
| 3-15-3-3     | 27  | 0.46       | 0.46             | 0.86           | 0.59      |
| 3-15-5-3     | 18  | 0.53       | 0.98             | 0.41           | 0.64      |
| 3-15-10-3    | 22  | 0.57       | 0.81             | 0.47           | 0.62      |
| 3-15-15-3    | 43  | 0.39       | 0.82             | 0.88           | 0.70      |
| 3-15-20-3    | 39  | 0.53       | 0.69             | 0.56           | 0.59      |
| 3-15-25-3    | 17  | 0.35       | 0.52             | 0.76           | 0.54      |
| 3-15-30-3    | 32  | 0.74       | 0.60             | 0.55           | 0.63      |
| 3-20-3-3     | 50  | 0.68       | 0.73             | 0.53           | 0.65      |
| 3-20-5-3     | 37  | 0.37       | 0.31             | 0.70           | 0.46      |
| 3-20-10-3    | 50  | 0.73       | 0.25             | 0.67           | 0.55      |
| 3-20-15-3    | 10  | 0.87       | 0.33             | 0.81           | 0.67      |
| 3-20-20-3    | 26  | 0.98       | 0.92             | 0.74           | 0.88      |
| 3-20-25-3    | 21  | 0.31       | 0.58             | 0.95           | 0.61      |
| 3-20-30-3    | 44  | 1.00       | 0.85             | 0.28           | 0.71      |
| 3-25-3-3     | 19  | 0.75       | 0.25             | 0.54           | 0.51      |
| 3-25-5-3     | 29  | 0.82       | 0.56             | 0.49           | 0.62      |
| 3-25-10-3    | 15  | 0.62       | 0.29             | 0.66           | 0.52      |
| 3-25-15-3    | 17  | 0.40       | 0.68             | 0.97           | 0.68      |
| 3-25-20-3    | 22  | 0.49       | 0.93             | 0.83           | 0.75      |
| 3-25-25-3    | 3   | 0.67       | 0.39             | 0.75           | 0.60      |
| 3-25-30-3    | 33  | 0.74       | 0.40             | 1.00           | 0.71      |

**Table S8.** Results obtained for the three dependent variables for the prediction step for architectures 5-X-X-3.

| Architecture | Run | % Hardness | % Water Activity | % Adhesiveness | % Average |
|--------------|-----|------------|------------------|----------------|-----------|
| 5-3-5-3      | 42  | 0.51       | 0.44             | 0.41           | 0.45      |
| 5-3-10-3     | 10  | 0.28       | 0.55             | 0.90           | 0.58      |
| 5-3-15-3     | 25  | 0.69       | 0.57             | 0.84           | 0.70      |
| 5-3-20-3     | 36  | 0.65       | 0.47             | 0.40           | 0.51      |
| 5-3-25-3     | 10  | 0.73       | 0.93             | 0.88           | 0.85      |
| 5-3-30-3     | 28  | 0.68       | 0.50             | 0.29           | 0.49      |
| 5-5-5-3      | 1   | 0.93       | 0.39             | 0.40           | 0.57      |
| 5-5-10-3     | 14  | 1.00       | 0.94             | 0.74           | 0.89      |
| 5-5-15-3     | 50  | 0.56       | 0.27             | 0.37           | 0.40      |
| 5-5-20-3     | 8   | 0.63       | 0.36             | 0.95           | 0.65      |
| 5-5-25-3     | 24  | 0.53       | 0.95             | 0.97           | 0.82      |
| 5-5-30-3     | 42  | 0.64       | 0.43             | 0.37           | 0.48      |
| 5-10-5-3     | 15  | 0.95       | 0.93             | 0.61           | 0.83      |
| 5-10-10-3    | 1   | 0.46       | 0.57             | 0.84           | 0.62      |
| 5-10-15-3    | 46  | 0.29       | 0.31             | 0.60           | 0.40      |
| 5-10-20-3    | 26  | 0.43       | 0.58             | 0.59           | 0.53      |
| 5-10-25-3    | 49  | 0.99       | 0.74             | 0.26           | 0.66      |
| 5-10-30-3    | 7   | 0.63       | 0.67             | 0.75           | 0.68      |
| 5-15-5-3     | 33  | 0.27       | 0.81             | 0.72           | 0.60      |
| 5-15-10-3    | 27  | 0.52       | 0.58             | 0.29           | 0.46      |
| 5-15-15-3    | 41  | 0.65       | 0.81             | 0.30           | 0.59      |
| 5-15-20-3    | 38  | 0.43       | 0.75             | 0.99           | 0.72      |
| 5-15-25-3    | 42  | 0.89       | 0.61             | 0.88           | 0.79      |
| 5-15-30-3    | 22  | 0.36       | 0.78             | 0.66           | 0.60      |
| 5-20-5-3     | 1   | 0.63       | 0.65             | 0.98           | 0.75      |
| 5-20-10-3    | 1   | 0.67       | 0.71             | 0.33           | 0.57      |
| 5-20-15-3    | 29  | 0.43       | 0.90             | 0.82           | 0.72      |
| 5-20-20-3    | 12  | 0.86       | 0.28             | 0.74           | 0.63      |
| 5-20-25-3    | 12  | 0.96       | 0.40             | 0.41           | 0.59      |
| 5-20-30-3    | 14  | 0.95       | 0.60             | 0.25           | 0.60      |
| 5-25-5-3     | 8   | 0.61       | 0.96             | 0.66           | 0.74      |
| 5-25-10-3    | 16  | 0.71       | 0.96             | 0.94           | 0.87      |
| 5-25-15-3    | 2   | 0.74       | 0.53             | 0.71           | 0.66      |
| 5-25-20-3    | 26  | 0.72       | 0.37             | 0.58           | 0.56      |
| 5-25-25-3    | 8   | 0.28       | 0.92             | 0.38           | 0.53      |
| 5-25-30-3    | 18  | 0.25       | 0.48             | 0.44           | 0.39      |
| 5-30-5-3     | 40  | 0.56       | 0.77             | 0.54           | 0.62      |
| 5-30-10-3    | 3   | 0.32       | 0.99             | 0.73           | 0.68      |
| 5-30-15-3    | 18  | 0.62       | 0.80             | 0.54           | 0.65      |
| 5-30-20-3    | 10  | 0.54       | 0.76             | 0.77           | 0.69      |
| 5-30-25-3    | 26  | 0.62       | 0.97             | 0.50           | 0.70      |
| 5-30-30-3    | 3   | 0.53       | 0.92             | 0.87           | 0.77      |

**Table S9.** Results obtained for the three dependent variables for the prediction step for architectures 7-X-X-3.

| Architecture | Run | % Hardness | % Water Activity | % Adhesiveness | % Average |
|--------------|-----|------------|------------------|----------------|-----------|
| 7-3-5-3      | 26  | 0.93       | 0.46             | 0.92           | 0.77      |
| 7-3-10-3     | 37  | 0.94       | 0.78             | 0.16           | 0.63      |
| 7-3-15-3     | 2   | 0.46       | 0.73             | 0.69           | 0.63      |
| 7-3-20-3     | 34  | 0.32       | 0.94             | 0.44           | 0.57      |
| 7-3-25-3     | 15  | 1.00       | 0.89             | 0.20           | 0.70      |
| 7-3-30-3     | 14  | 0.63       | 0.56             | 0.92           | 0.70      |
| 7-5-5-3      | 38  | 0.38       | 0.55             | 0.77           | 0.57      |
| 7-5-10-3     | 8   | 0.40       | 0.79             | 0.96           | 0.72      |
| 7-5-15-3     | 3   | 1.00       | 0.46             | 0.37           | 0.61      |
| 7-5-20-3     | 9   | 0.29       | 0.95             | 0.43           | 0.56      |
| 7-5-25-3     | 23  | 0.25       | 0.92             | 0.84           | 0.67      |
| 7-5-30-3     | 5   | 1.00       | 0.54             | 0.94           | 0.83      |
| 7-10-5-3     | 8   | 0.87       | 0.84             | 0.64           | 0.78      |
| 7-10-10-3    | 20  | 0.89       | 0.75             | 0.49           | 0.71      |
| 7-10-15-3    | 18  | 0.45       | 0.37             | 0.31           | 0.38      |
| 7-10-20-3    | 36  | 0.19       | 0.40             | 0.15           | 0.25      |
| 7-10-25-3    | 40  | 0.73       | 0.93             | 0.20           | 0.62      |
| 7-10-30-3    | 15  | 0.18       | 0.31             | 0.33           | 0.27      |
| 7-15-5-3     | 13  | 1.00       | 0.50             | 0.55           | 0.68      |
| 7-15-10-3    | 20  | 0.42       | 0.44             | 0.56           | 0.47      |
| 7-15-15-3    | 49  | 0.16       | 0.34             | 0.55           | 0.35      |
| 7-15-20-3    | 6   | 0.34       | 0.85             | 0.52           | 0.57      |
| 7-15-25-3    | 47  | 0.31       | 0.22             | 0.79           | 0.44      |
| 7-15-30-3    | 31  | 0.30       | 0.37             | 0.88           | 0.52      |
| 7-20-5-3     | 6   | 0.57       | 0.69             | 0.28           | 0.51      |
| 7-20-10-3    | 14  | 0.21       | 0.79             | 0.39           | 0.46      |
| 7-20-15-3    | 13  | 0.49       | 0.16             | 0.27           | 0.31      |
| 7-20-20-3    | 24  | 0.45       | 0.81             | 0.45           | 0.57      |
| 7-20-25-3    | 6   | 0.86       | 0.96             | 0.50           | 0.77      |
| 7-20-30-3    | 14  | 0.34       | 0.23             | 0.58           | 0.38      |
| 7-25-5-3     | 17  | 0.51       | 0.21             | 0.30           | 0.34      |
| 7-25-10-3    | 3   | 0.84       | 0.72             | 0.67           | 0.74      |
| 7-25-15-3    | 37  | 0.95       | 0.62             | 0.99           | 0.85      |
| 7-25-20-3    | 29  | 0.26       | 0.61             | 0.35           | 0.41      |
| 7-25-25-3    | 13  | 0.76       | 0.45             | 0.66           | 0.62      |
| 7-25-30-3    | 16  | 0.88       | 0.35             | 0.58           | 0.60      |
| 7-30-5-3     | 15  | 0.72       | 0.90             | 0.62           | 0.75      |
| 7-30-10-3    | 16  | 0.68       | 0.45             | 0.84           | 0.66      |
| 7-30-15-3    | 45  | 0.71       | 0.57             | 0.25           | 0.51      |
| 7-30-20-3    | 32  | 0.59       | 0.43             | 0.39           | 0.47      |
| 7-30-25-3    | 18  | 0.62       | 0.36             | 0.68           | 0.55      |
| 7-30-30-3    | 50  | 0.67       | 0.42             | 0.33           | 0.47      |

**Table S10.** Results obtained for the three dependent variables for the prediction step for architectures 10-X-X-3.

| Architecture | Run | % Hardness | % Water Activity | % Adhesiveness | % Average |
|--------------|-----|------------|------------------|----------------|-----------|
| 10-3-5-3     | 44  | 0.22       | 0.11             | 0.45           | 0.26      |
| 10-3-10-3    | 22  | 0.14       | 0.08             | 0.32           | 0.18      |
| 10-3-15-3    | 27  | 0.25       | 0.11             | 0.55           | 0.30      |
| 10-3-20-3    | 23  | 0.09       | 0.05             | 0.28           | 0.14      |
| 10-3-25-3    | 15  | 0.23       | 0.07             | 0.32           | 0.21      |
| 10-3-30-3    | 32  | 0.15       | 0.05             | 0.24           | 0.15      |
| 10-5-5-3     | 21  | 0.17       | 0.06             | 0.29           | 0.17      |
| 10-5-10-3    | 32  | 0.35       | 0.16             | 1.40           | 0.64      |
| 10-5-15-3    | 21  | 0.22       | 0.05             | 0.25           | 0.17      |
| 10-5-20-3    | 18  | 0.27       | 0.03             | 0.33           | 0.21      |
| 10-5-25-3    | 27  | 0.16       | 0.08             | 0.18           | 0.14      |
| 10-5-30-3    | 35  | 0.13       | 0.03             | 0.34           | 0.17      |
| 10-10-5-3    | 26  | 0.15       | 0.04             | 0.23           | 0.14      |
| 10-10-10-3   | 8   | 0.36       | 0.10             | 0.40           | 0.29      |
| 10-10-15-3   | 6   | 0.31       | 0.09             | 0.30           | 0.23      |
| 10-10-20-3   | 12  | 0.19       | 0.05             | 0.24           | 0.16      |
| 10-10-25-3   | 1   | 0.22       | 0.10             | 0.29           | 0.20      |
| 10-10-30-3   | 42  | 0.25       | 0.07             | 0.29           | 0.20      |
| 10-15-5-3    | 48  | 0.15       | 0.05             | 0.47           | 0.22      |
| 10-15-10-3   | 9   | 0.14       | 0.08             | 0.36           | 0.19      |
| 10-15-15-3   | 7   | 0.43       | 0.13             | 0.50           | 0.35      |
| 10-15-20-3   | 34  | 0.18       | 0.17             | 0.38           | 0.24      |
| 10-15-25-3   | 44  | 0.59       | 0.06             | 0.52           | 0.39      |
| 10-15-30-3   | 49  | 0.19       | 0.08             | 0.36           | 0.21      |
| 10-20-5-3    | 3   | 0.33       | 0.08             | 0.26           | 0.22      |
| 10-20-10-3   | 4   | 0.13       | 0.05             | 0.30           | 0.16      |
| 10-20-15-3   | 12  | 0.24       | 0.04             | 0.89           | 0.39      |
| 10-20-20-3   | 21  | 0.19       | 0.03             | 0.41           | 0.21      |
| 10-20-25-3   | 16  | 0.20       | 0.06             | 0.59           | 0.28      |
| 10-20-30-3   | 27  | 0.34       | 0.06             | 0.42           | 0.27      |
| 10-25-5-3    | 30  | 0.62       | 0.22             | 0.16           | 0.33      |
| 10-25-10-3   | 46  | 0.30       | 0.06             | 0.27           | 0.21      |
| 10-25-15-3   | 47  | 0.13       | 0.08             | 0.36           | 0.19      |
| 10-25-20-3   | 29  | 0.22       | 0.12             | 0.51           | 0.28      |
| 10-25-25-3   | 40  | 0.14       | 0.06             | 0.14           | 0.11      |
| 10-25-30-3   | 27  | 0.36       | 0.10             | 0.59           | 0.35      |
| 10-30-5-3    | 28  | 0.23       | 0.07             | 0.50           | 0.27      |
| 10-30-10-3   | 44  | 0.06       | 0.07             | 0.13           | 0.09      |
| 10-30-15-3   | 3   | 0.14       | 0.08             | 0.13           | 0.12      |
| 10-30-20-3   | 42  | 0.37       | 0.13             | 0.21           | 0.24      |
| 10-30-25-3   | 31  | 0.22       | 0.05             | 0.36           | 0.21      |
| 10-30-30-3   | 30  | 0.11       | 0.06             | 0.57           | 0.25      |

**Table S11.** Results obtained for the three dependent variables for the prediction step for architectures 15-X-X-3.

| Architecture | Run | % Hardness | % Water Activity | % Adhesiveness | % Average |
|--------------|-----|------------|------------------|----------------|-----------|
| 15-3-5-3     | 20  | 0.74       | 0.85             | 0.14           | 0.58      |
| 15-3-10-3    | 45  | 0.43       | 0.21             | 0.05           | 0.23      |
| 15-3-15-3    | 1   | 0.42       | 0.27             | 0.65           | 0.45      |
| 15-3-20-3    | 31  | 0.31       | 0.78             | 0.40           | 0.50      |
| 15-3-25-3    | 33  | 0.79       | 0.73             | 0.60           | 0.71      |
| 15-3-30-3    | 37  | 0.87       | 0.94             | 0.21           | 0.67      |
| 15-5-5-3     | 13  | 0.24       | 0.54             | 0.61           | 0.46      |
| 15-5-10-3    | 19  | 0.92       | 0.77             | 0.32           | 0.67      |
| 15-5-15-3    | 39  | 0.84       | 0.28             | 0.11           | 0.41      |
| 15-5-20-3    | 38  | 0.37       | 0.61             | 1.00           | 0.66      |
| 15-5-25-3    | 30  | 0.26       | 0.75             | 0.90           | 0.64      |
| 15-5-30-3    | 46  | 0.90       | 0.98             | 0.98           | 0.95      |
| 15-10-5-3    | 26  | 0.71       | 0.94             | 0.49           | 0.71      |
| 15-10-10-3   | 27  | 0.98       | 0.69             | 0.60           | 0.76      |
| 15-10-15-3   | 12  | 0.36       | 0.52             | 0.63           | 0.50      |
| 15-10-20-3   | 8   | 0.02       | 0.12             | 0.71           | 0.28      |
| 15-10-25-3   | 32  | 0.85       | 0.31             | 0.36           | 0.51      |
| 15-10-30-3   | 7   | 0.80       | 0.58             | 0.89           | 0.76      |
| 15-15-5-3    | 20  | 0.24       | 0.66             | 0.32           | 0.41      |
| 15-15-10-3   | 31  | 0.88       | 0.47             | 0.05           | 0.47      |
| 15-15-15-3   | 11  | 0.26       | 0.68             | 0.46           | 0.47      |
| 15-15-20-3   | 38  | 0.67       | 0.82             | 0.77           | 0.75      |
| 15-15-25-3   | 49  | 0.88       | 0.69             | 0.83           | 0.80      |
| 15-15-30-3   | 46  | 0.83       | 0.98             | 0.79           | 0.87      |
| 15-20-5-3    | 20  | 0.62       | 0.66             | 0.51           | 0.60      |
| 15-20-10-3   | 39  | 0.40       | 0.73             | 0.58           | 0.57      |
| 15-20-15-3   | 33  | 0.40       | 0.19             | 0.97           | 0.52      |
| 15-20-20-3   | 4   | 0.54       | 0.91             | 0.73           | 0.73      |
| 15-20-25-3   | 44  | 0.57       | 0.57             | 0.38           | 0.51      |
| 15-20-30-3   | 42  | 0.78       | 0.97             | 0.76           | 0.84      |
| 15-25-5-3    | 8   | 0.92       | 0.39             | 0.76           | 0.69      |
| 15-25-10-3   | 18  | 0.11       | 0.05             | 0.18           | 0.11      |
| 15-25-15-3   | 41  | 0.45       | 0.25             | 0.80           | 0.50      |
| 15-25-20-3   | 45  | 0.16       | 0.62             | 0.18           | 0.32      |
| 15-25-25-3   | 47  | 0.72       | 0.42             | 0.80           | 0.65      |
| 15-25-30-3   | 31  | 0.31       | 0.13             | 0.24           | 0.23      |
| 15-30-5-3    | 39  | 0.29       | 0.93             | 0.70           | 0.64      |
| 15-30-10-3   | 33  | 0.30       | 0.29             | 0.77           | 0.45      |
| 15-30-15-3   | 6   | 0.10       | 0.74             | 0.20           | 0.35      |
| 15-30-20-3   | 39  | 0.17       | 0.73             | 0.06           | 0.32      |
| 15-30-25-3   | 12  | 0.26       | 0.66             | 0.64           | 0.52      |
| 15-30-30-3   | 14  | 0.99       | 0.96             | 0.15           | 0.70      |

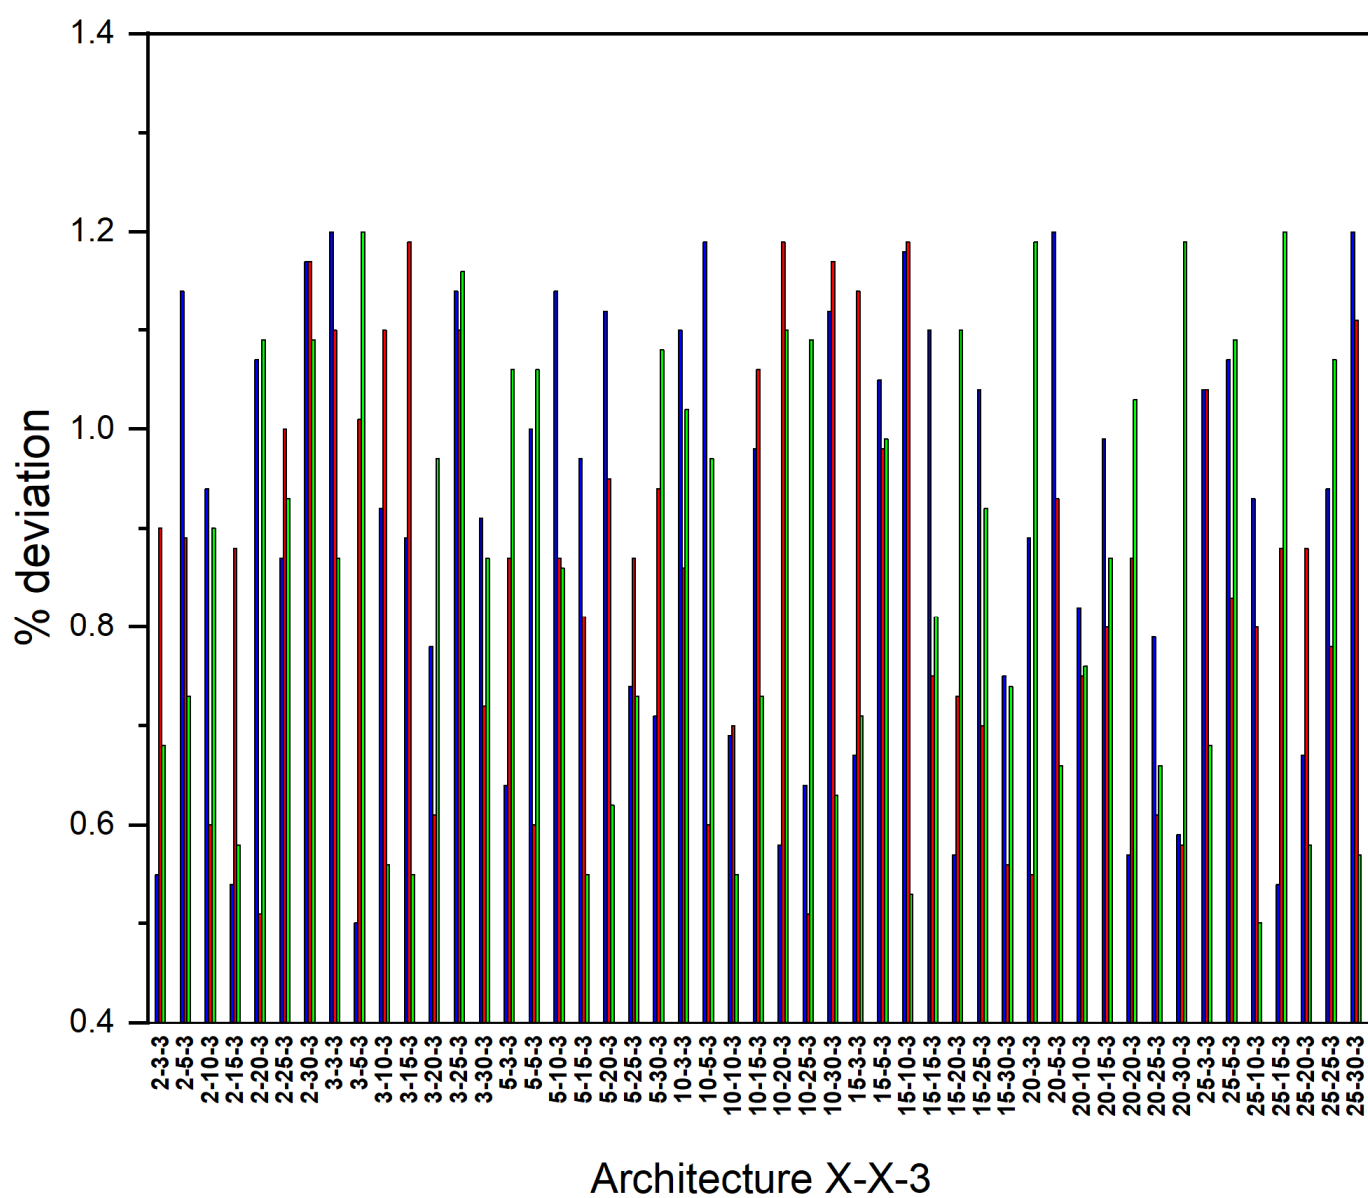

**Figure S1.** Architecture X-X-3 (blue: % hardness, red: % water activity, green: % adhesiveness).

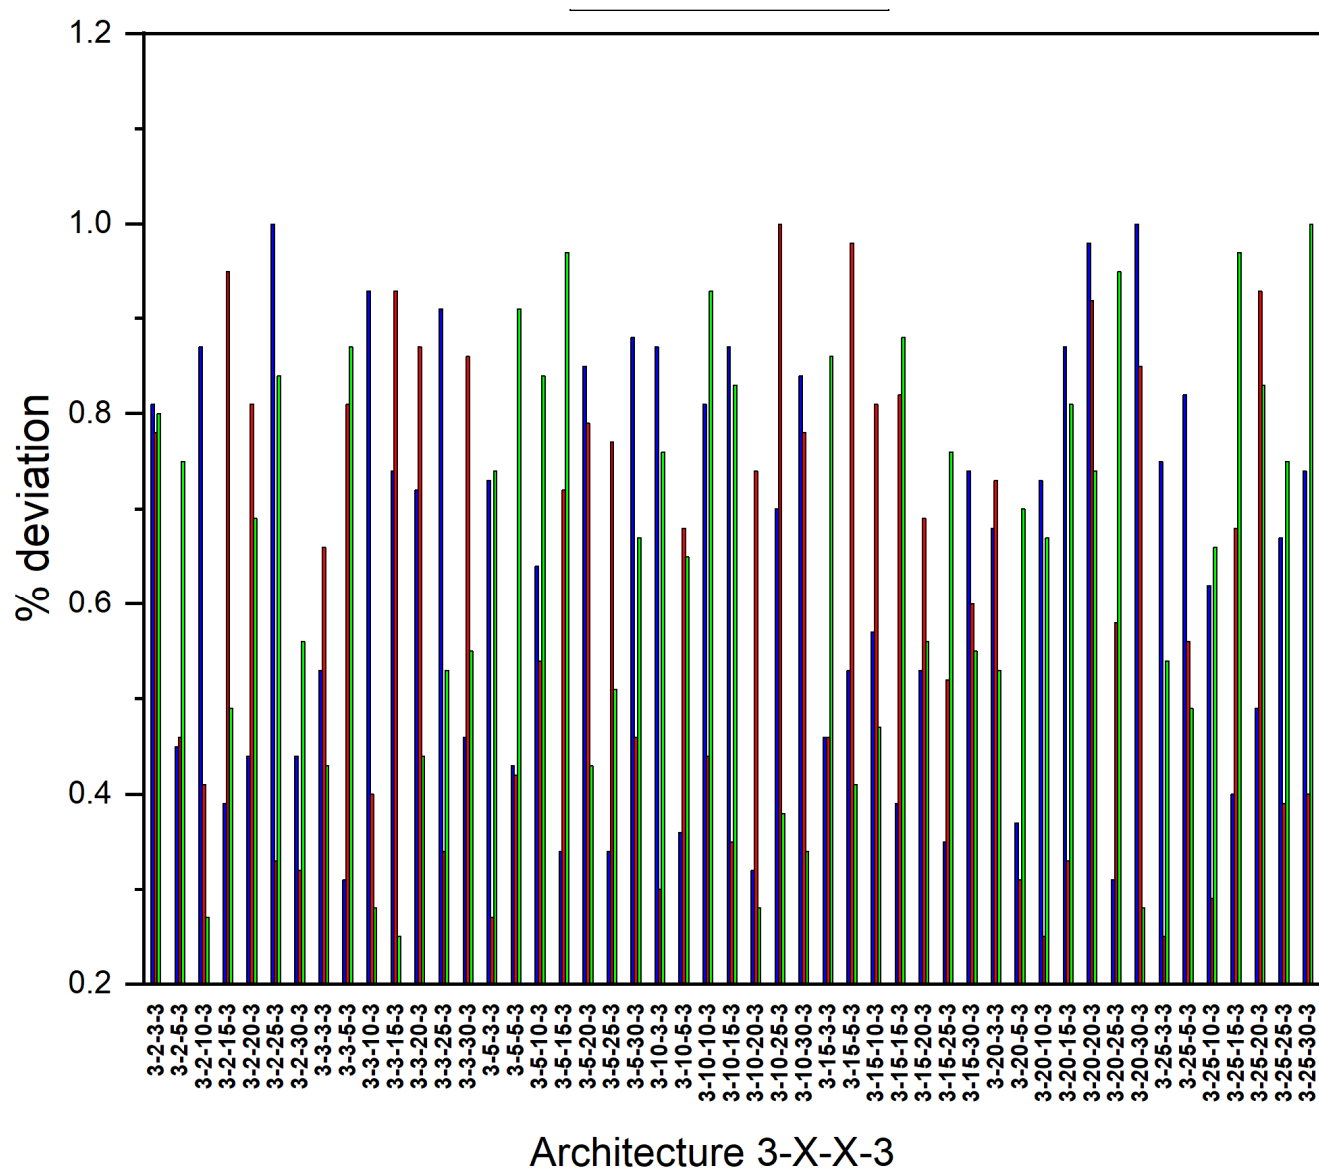

Figure S2. Architecture 3-X-X-3 (blue: % hardness, red: % water activity, green: % adhesiveness).

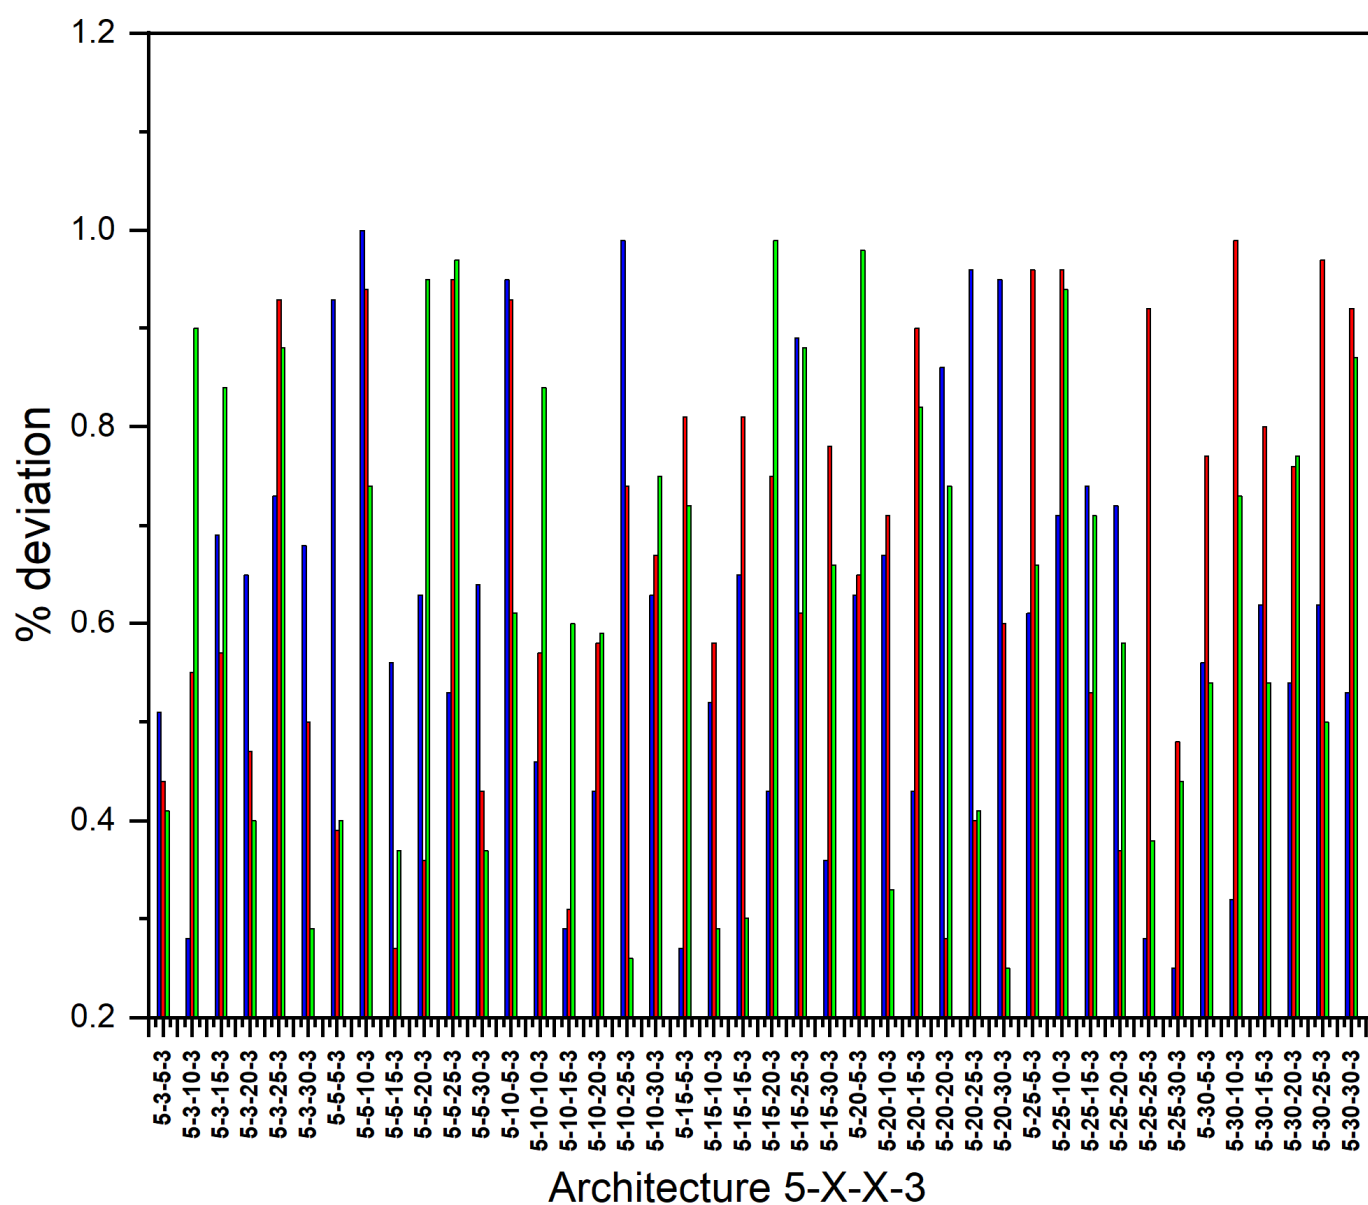

Figure S3. Architecture 5-X-X-3 (blue: % hardness, red: % water activity, green: % adhesiveness).

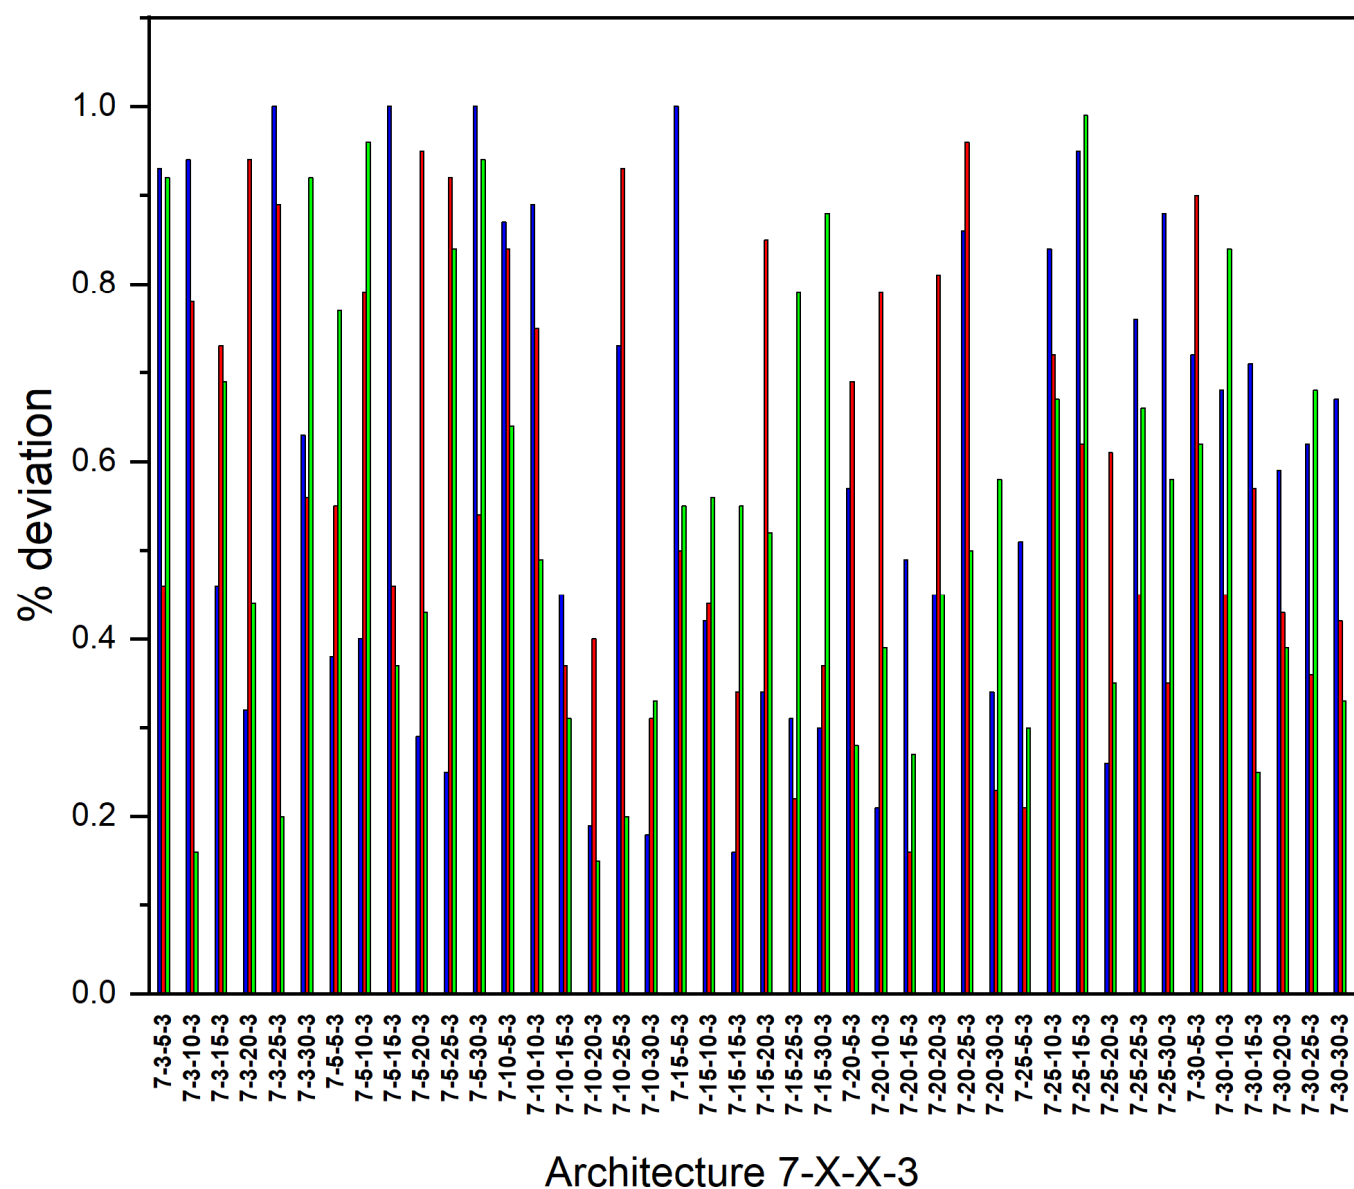

Figure S4. Architecture 7-X-X-3 (blue: % hardness, red: % water activity, green: % adhesiveness).

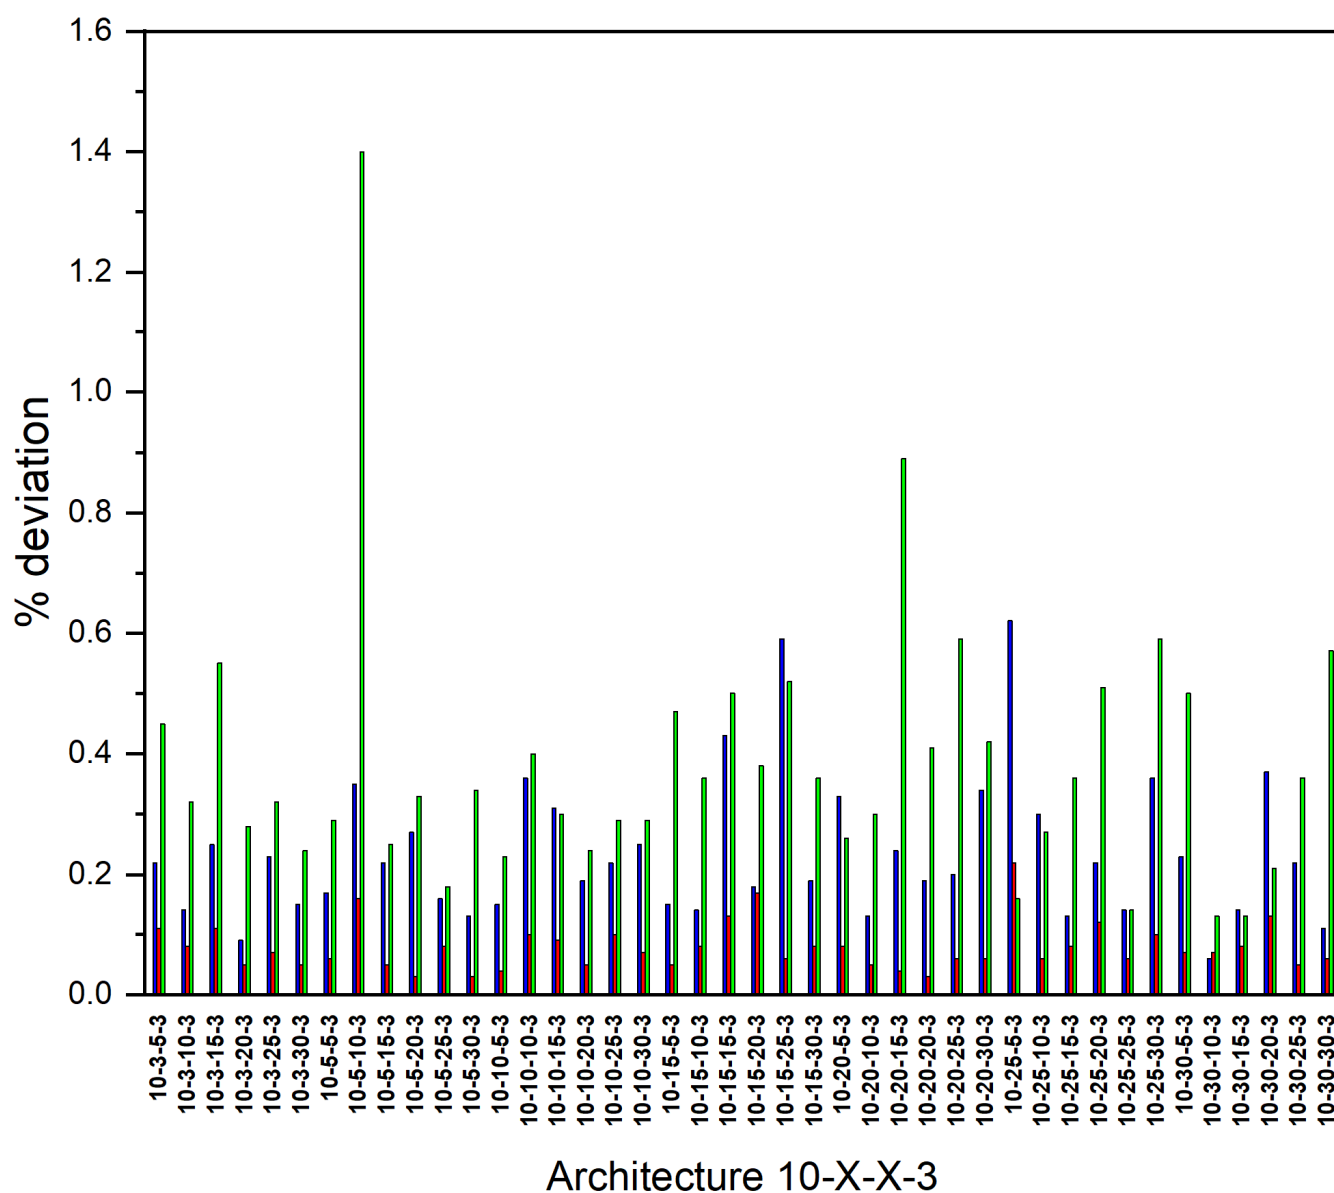

Figure S5. Architecture 10-X-X-3 (blue: % hardness, red: % water activity, green: % adhesiveness).

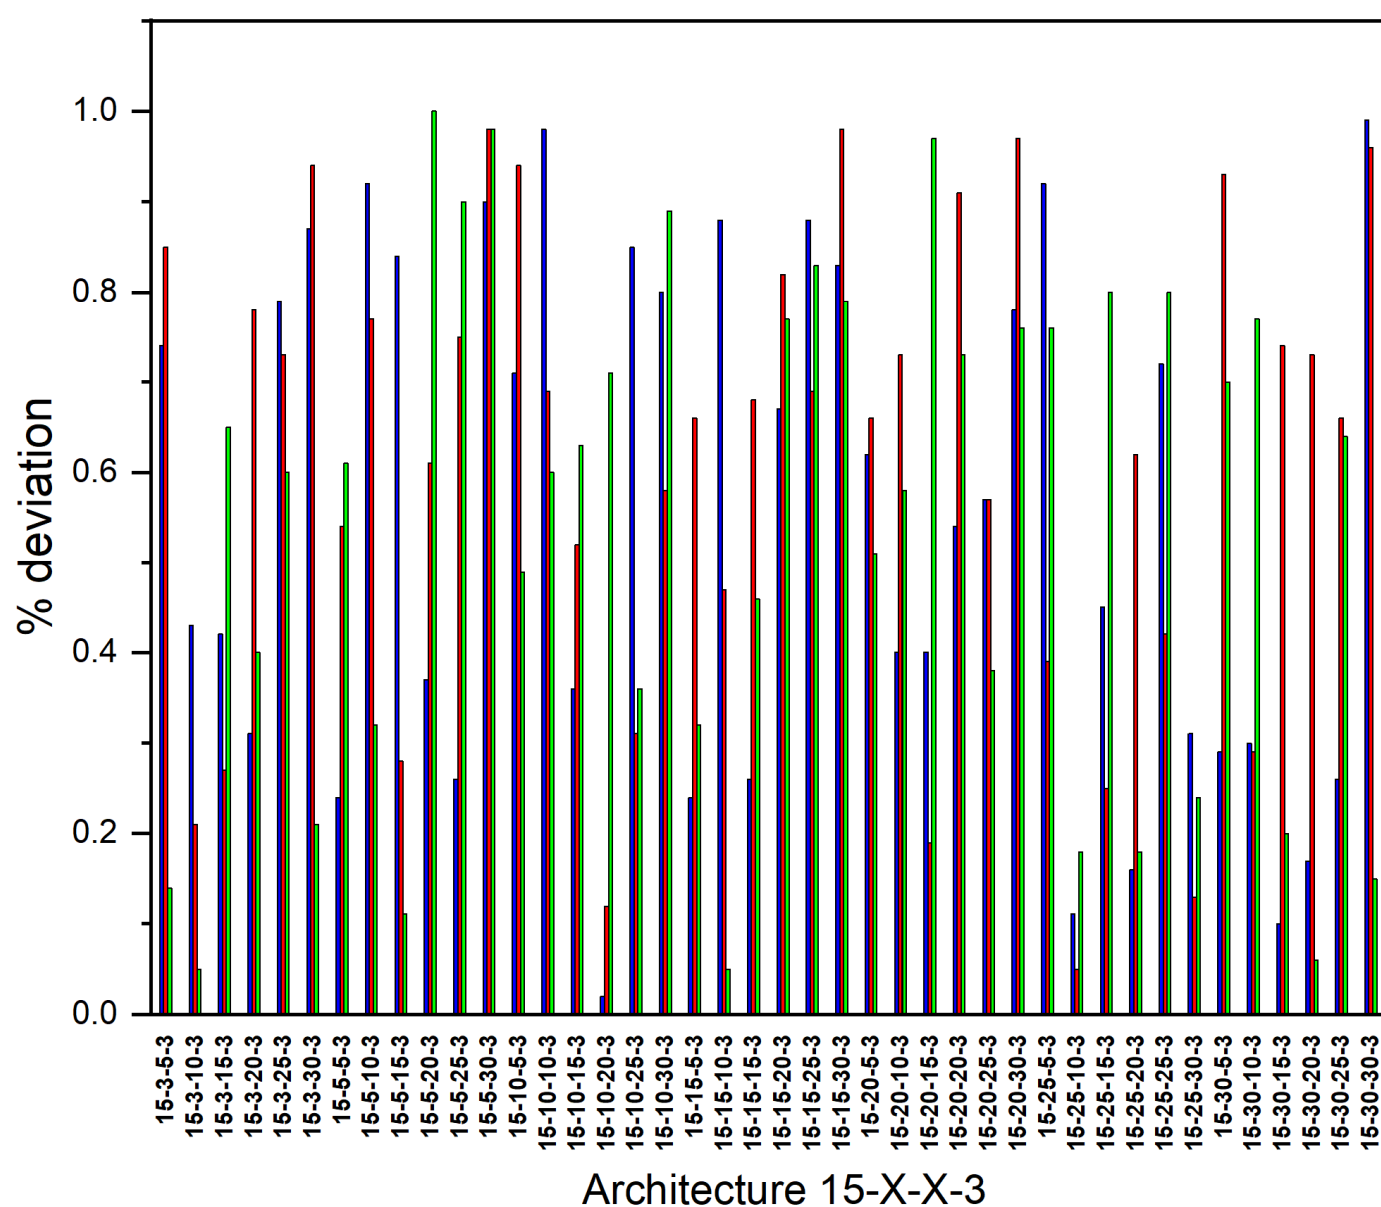

Figure S6. Architecture 15-X-X-3 (blue: % hardness, red: % water activity, green: % adhesiveness).

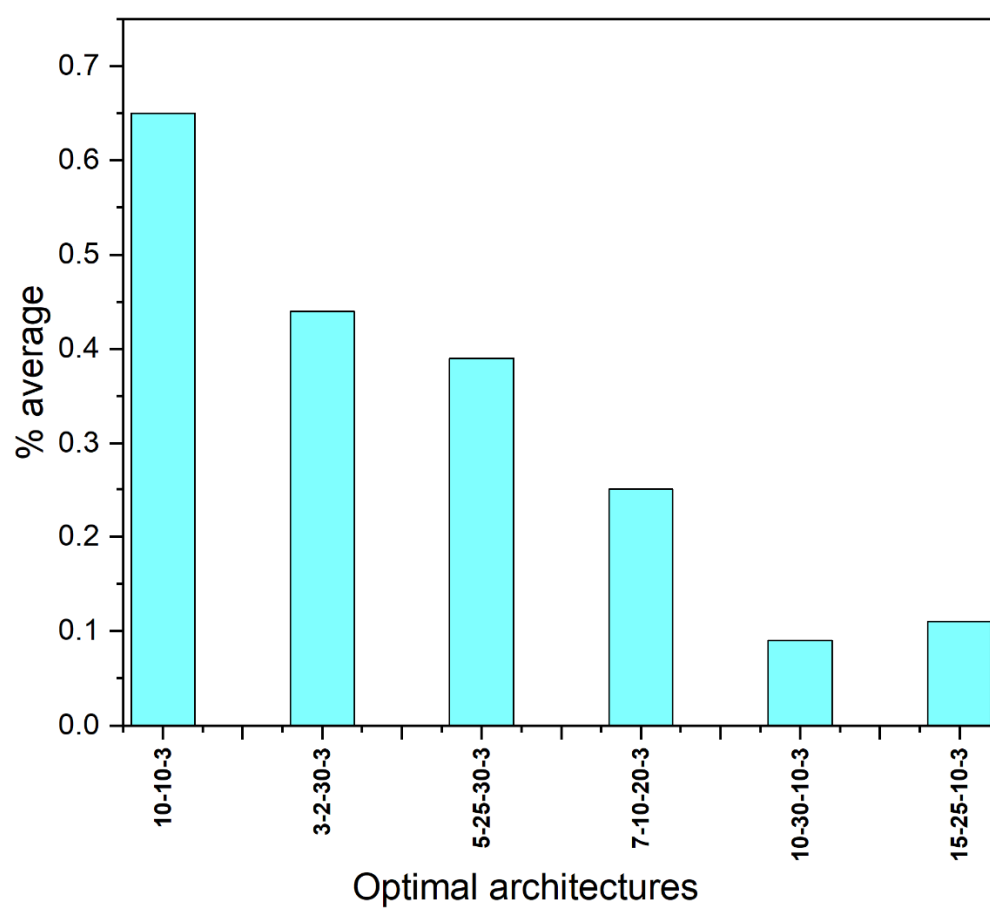

**Figure S7.** Optimal architectures for three and four layers.
